# Supplementary material for: Concurrent Anti-glomerular Basement Membrane Nephritis and IgA Nephropathy
Source: PubMed Central journal article supplement — J Pathol Transl Med. 2019 Sep 16;53(6):399–402. doi: 10.4132/jptm.2019.08.05 (PMC6877440; doi:10.4132/jptm.2019.08.05), 2019-09-16
Supplement: jptm-2019-08-05-suppl.pdf [file jptm-2019-08-05-suppl.pdf]

**Supplementary Table S1.** A literature review of clinicopathologic features in 10 cases (including the present case) with concurrent anti-GBM nephritis and IgA nephropathy

| Reference, year                      | Country | Number | Sex (M/F) | Age (yr) | Present illness                   | Hypertension                             | Diabetes | History of upper respiratory tract infection | Previous history of proteinuria and hematuria | Hemoptysis | Oliguria | Nephrotic syndrome | HBV infection | 24 Urine proteinuria (g/day) or spot urine | Creatinine (mg/dl) | Anti-GBM Ab             | Crescent (%)          | Treatments                                           | Plasmapheresis                     | Prognosis    | Hemodialysis             | Other specific feature                            |
|--------------------------------------|---------|--------|-----------|----------|-----------------------------------|------------------------------------------|----------|----------------------------------------------|-----------------------------------------------|------------|----------|--------------------|---------------|--------------------------------------------|--------------------|-------------------------|-----------------------|------------------------------------------------------|------------------------------------|--------------|--------------------------|---------------------------------------------------|
| Trpkov et al. (1998) <sup>1</sup>    | Canada  | 1      | M         | 54       | Anorexia<br>Malaise<br>Lethargy   | Negative                                 | Negative | Negative                                     | Negative                                      | Negative   | Negative | Negative           | Negative      | ≥2                                         | 8.1                | Postive (not described) | 25%                   | IV Metyl-PD+IV cyclophosphamide                      | Performed                          | Improved     | Death due to GI bleeding | Transplant due to Goodpasture disease             |
| Cui et al. (2006) <sup>2</sup>       | China   | 1      | F         | 27       | Oliguria                          | Negative                                 | Negative | Positive                                     | Negative                                      | Negative   | Positive | Negative           | Negative      | Postive (not described)                    | 15.2               | 134%                    | 100%                  | IV Metyl-PD+ Oral-PD+IV cyclophosphamide             | Not performed                      | Not improved | Dependent                |                                                   |
| Wechsler et al. (2008) <sup>3</sup>  | USA     | 1      | M         | 55       | Gross hematuria                   | Positive                                 | Positive | Negative                                     | Positive                                      | Negative   | Negative | Negative           | Negative      | 2.8                                        | 3.5                | 8.6 EU/mL               | 20%                   | IV Metyl-PD+IVIG + Mycophenolate mofetil + Rituximab | Not performed                      | Improved     | Independent              | Acquired immune deficiency syndrome               |
| Wang et al. (2012) <sup>4</sup>      | China   | 1      | F         | 31       | Edema<br>Gross hematuria          | 164/74 mm Hg<br>Negative                 | Negative | Negative                                     | Negative                                      | Negative   | Negative | Positive           | Negative      | 3.8                                        | 3.2                | 93.5 RU/mL              | 2/10 cellular<br>100% | IV Metyl-PD+ Oral-PD+IV cyclophosphamide             | Performed                          | Not improved | Independent              | Septic arthritis                                  |
| Yamaguchi et al. (2013) <sup>5</sup> | Japan   | 1      | M         | 46       | Azotemia<br>Fever                 | Positive, but controlled<br>134/83 mm Hg | Positive | Negative                                     | Positive<br>Hematuria, proteinuria            | Negative   |          | Negative           | Negative      | 2.9                                        | 5.2                | 214 EU/mL               | 15/16 cellular<br>94% | IV Metyl-PD+Oral-PD                                  | Performed<br>Failed due to allergy | Not improved | Dependent                |                                                   |
| Gao et al. (2014) <sup>6</sup>       | China   | 1      | F         | 38       | Anorexia<br>Fatigue               | Negative                                 | Negative | Positive                                     | Negative                                      | Negative   | Negative | Negative           | Negative      | 2.2                                        | 2.8                | 237.6 EU/mL             | 28%                   | IV Metyl-PD+ Oral-PD+IV cyclophosphamide             | Not performed                      | Improved     | Independent              |                                                   |
| Troxell et al. (2016) <sup>7</sup>   | USA     | 1      | F         | 60       | Fever<br>Dysphagia<br>Weight loss | Negative                                 | Negative | Negative                                     | Negative                                      | Negative   | Negative | Negative           | Negative      | 0.4                                        | 0.73               | 120–150%                | 8%                    | IV Metyl-PD+ Oral-PD+ Methotrexate                   | Not performed                      | Improved     | Independent              |                                                   |
| Ge et al. (2015) <sup>8</sup>        | China   | 1      | M         | 24       | Edema<br>Headache                 | Positive                                 | Negative | Negative                                     | Negative                                      | Negative   | Negative | Positive           | Positive      | 7.04                                       | 3.7                | Postive (not described) | 58%                   | IV Metyl-PD+ Oral-PD+IV cyclophosphamide             | Not performed                      | Not improved | Dependent                | Reversible posterior leukoencephalopathy syndrome |
| Xu et al. (2016) <sup>9</sup>        | China   | 1      | F         | 50       | Nocturia<br>Gross hematuria       | Negative                                 | Negative | Negative                                     | Positive<br>Hematuria                         | Negative   | Negative | Negative           | Negative      | 0.41                                       | 2.6                | 258 EU/mL               | 18/31 cellular<br>89% | IV Metyl-PD+ Oral-PD+ Mycophenolate mofetil          | Not performed                      | Improved     | Independent              |                                                   |
| This case                            | Korea   | 1      | F         | 38       | Fever                             | Negative                                 | Negative | Negative                                     | Positive                                      | Negative   | Negative | Negative           | Negative      | 1.4                                        | 5.4                | 187.2 U/mL              | 63%                   | IV Metyl-PD+ Oral-PD+IV cyclophosphamide             | Not performed                      | Improved     | Independent              |                                                   |

GBM, glomerular basement membrane; HBV, hepatitis B virus; PD, prednisolone; GI, gastrointestinal.

#### REFERENCES

1. Trpkov K, Abdulkareem F, Jim K, Solez K. Recurrence of anti-GBM antibody disease twelve years after transplantation associated with de novo IgA nephropathy. *Clin Nephrol* 1998; 49: 124-8.
2. Cui Z, Zhao MH, Wang SX, Liu G, Zou WZ, Wang HY. Concurrent antiglomerular basement membrane disease and immune complex glomerulonephritis. *Ren Fail* 2006; 28: 7-14.
3. Wechsler E, Yang T, Jordan SC, Vo A, Nast CC. Anti-glomerular basement membrane disease in an HIV-infected patient. *Nat Clin Pract Nephrol* 2008; 4: 167-71.
4. Wang A, Wang Y, Wang G, Zhou Z, Xun Z, Tan X. Mesangial IgA deposits indicate pathogenesis of anti-glomerular basement membrane disease. *Mol Med Rep* 2012; 5: 1212-4.
5. Yamaguchi H, Takizawa H, Ogawa Y, Takada T, Yamaji I, Ura N. A case report of the anti-glomerular basement membrane glomerulonephritis with mesangial IgA deposition. *CEN Case Rep* 2013; 2: 6-10.
6. Gao B, Li M, Xia W, Wen Y, Qu Z. Rapidly progressive glomerulonephritis due to anti-glomerular basement membrane disease accompanied by IgA nephropathy: a case report. *Clin Nephrol* 2014; 81: 138-41.
7. Troxell ML, Houghton DC. Atypical anti-glomerular basement membrane disease. *Clin Kidney J* 2016; 9: 211-21.
8. Ge YT, Liao JL, Liang W, Xiong ZY. Anti-glomerular basement membrane disease combined with IgA nephropathy complicated with reversible posterior leukoencephalopathy syndrome: an unusual case. *Am J Case Rep* 2015; 16: 849-53.
9. Xu D, Wu J, Wu J, et al. Novel therapy for anti-glomerular basement membrane disease with IgA nephropathy: a case report. *Exp Ther Med* 2016; 11: 1889-92.
